# Supplementary material for: Gold nanorod-based multiplex bioanalytical assay for the detection of CYFRA 21-1 and CA-125: towards oral cancer diagnostics
Source: Royal Society of Chemistry journal article supplement (doi:10.1039/d2ay01216b), 2022-01-01
Supplement: d2ay01216b1.pdf [file d2ay01216b1.pdf]

# Gold nanorods-based multiplex bioanalytical assay for the detection of CYFRA 21-1 and CA-125: Towards oral cancer diagnostics

Debolina Chakraborty<sup>1</sup>, Amitava Mukherjee<sup>2\*</sup>, K.R. Ethiraj<sup>1\*</sup>,

<sup>1</sup> School of Advanced Sciences, Vellore Institute of Technology, Vellore, India.

<sup>2</sup> Centre for Nanobiotechnology, Vellore Institute of Technology, Vellore, India.

## SUPPLEMENTARY INFORMTION

### \*Corresponding authors

**Dr. Amitava Mukherjee**  
Senior Professor & Director  
Centre for Nanobiotechnology  
Vellore Institute of Technology, Vellore – 632014, India.  
Email: [amit.mookerjea@gmail.com](mailto:amit.mookerjea@gmail.com), [amitav@vit.ac.in](mailto:amitav@vit.ac.in)  
Phone: 91 416 2202620  
Fax: 91-416-224309

**K.R. Ethiraj**  
Senior Professor  
School of Advanced Sciences  
Vellore Institute of Technology, Vellore – 632014, India.  
Email: [ethukr@gmail.com](mailto:ethukr@gmail.com)

**Table S1.** Alterations of the physicochemical parameters before and after ligand exchange.

| CTAB-GNRs | TSPR (nm) | LSPR (nm) | MHD (nm)  | Zeta potential (mV) |
|-----------|-----------|-----------|-----------|---------------------|
| AR 2.1    | 512       | 609       | 28.2±0.2  | 48.5± 1.2           |
| AR 3.9    | 515       | 768       | 32.4±2.2  | 49.6± 2.4           |
| MUA -GNRs |           |           |           |                     |
| AR 2.1    | 514       | 609       | 25.7± 1.5 | -39.3± 2.4          |
| AR 3.9    | 515       | 769       | 29.4± 1.1 | -32.1± 3.3          |

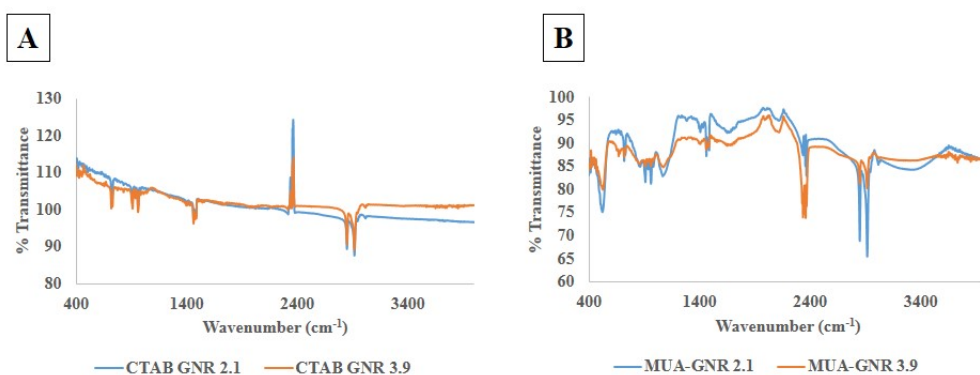

**Fig. S1** FTIR spectra of differently sized GNRs (A) CTAB capping (B) MUA capping

**Table S2.** Statistical performance of the sensor for the detection of CYFRA 21-1 and CA-125

| CYFRA 21-1<br>Concentration (ng/mL) | RSD %      |            |                |
|-------------------------------------|------------|------------|----------------|
|                                     | Run-to-run | Day-to-day | Batch-to-batch |
| 0.496                               | 0.62       | 1.43       | 1.82           |
| 3.1                                 | 0.85       | 1.33       | 1.49           |
| 7.7                                 | 1.06       | 1.53       | 1.55           |
| 48.4                                | 0.40       | 1.86       | 2.27           |
| CA-125 Concentration<br>(U/mL)      | RSD %      |            |                |
|                                     | Run-to-run | Day-to-day | Batch-to-batch |
| 5                                   | 0.95       | 1.41       | 1.63           |
| 20                                  | 0.63       | 1.27       | 1.62           |
| 80                                  | 0.44       | 1.88       | 2.17           |
| 320                                 | 1.16       | 0.95       | 2.62           |

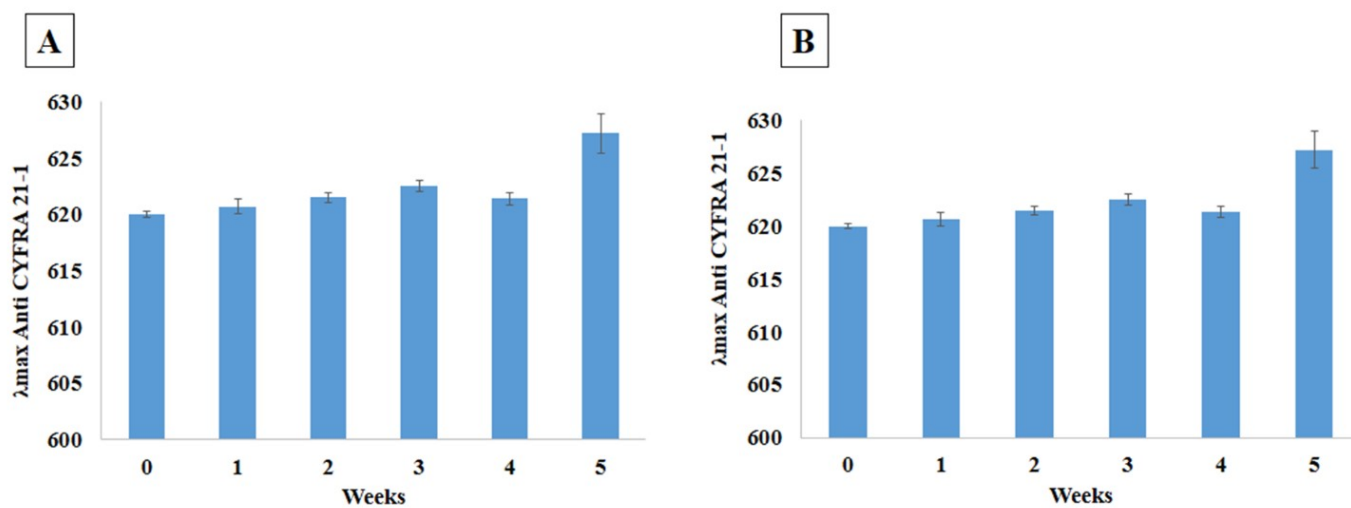

**Fig. S2.** Shelf-life of (A) Anti CYFRA 21-1 GNRs (B) Anti CA-125 GNRs
